# Supplementary material for: Autonomic Dysfunction during Acute SARS-CoV-2 Infection: A Systematic Review
Source: J Clin Med. 2022 Jul 4;11(13):3883. doi: 10.3390/jcm11133883 (PMC9267913; doi:10.3390/jcm11133883)
Supplement: Supplementary file 1 [file jcm-11-03883-s001.zip › jcm-1786084-supplementary.pdf]

## Supplementary materials

|                            | Clearly stated question/objective | Clearly defined study population | Participation rate >50% | Recruitment from the same population - inclusion and exclusion criteria | Sample size justification | Exposure measured prior to the outcome | Sufficient timeframe | Different levels of exposure | Clearly defined exposure | Exposure assessed more than once | Clearly defined outcome | Outcome assessors blinded to exposure | Loss to follow up < 20% | Adjusted statistical methods | Overall quality score |
|----------------------------|-----------------------------------|----------------------------------|-------------------------|-------------------------------------------------------------------------|---------------------------|----------------------------------------|----------------------|------------------------------|--------------------------|----------------------------------|-------------------------|---------------------------------------|-------------------------|------------------------------|-----------------------|
| Aragón-Benedi et al., 2021 | ●                                 | ●                                | ●                       | ●                                                                       | ●                         | ●                                      | ●                    | ●                            | ●                        | ●                                | ●                       | ●                                     | ●                       | ●                            | ●                     |
| Battaglini et al., 2020    | ●                                 | ●                                | ●                       | ●                                                                       | ●                         | ●                                      | ●                    | ●                            | ●                        | ●                                | ●                       | ●                                     | ●                       | ●                            | ●                     |
| Bellavia et al., 2021      | ●                                 | ●                                | ●                       | ●                                                                       | ●                         | ●                                      | ●                    | ●                            | ●                        | ●                                | ●                       | ●                                     | ●                       | ●                            | ●                     |
| Hasty et al., 2021         | ●                                 | ●                                | ●                       | ●                                                                       | ●                         | ●                                      | ●                    | ●                            | ●                        | ●                                | ●                       | ●                                     | ●                       | ●                            | ●                     |
| Hirten et al., 2021        | ●                                 | ●                                | ●                       | ●                                                                       | ●                         | ●                                      | ●                    | ●                            | ●                        | ●                                | ●                       | ●                                     | ●                       | ●                            | ●                     |
| Kaliyaperumal et al., 2021 | ●                                 | ●                                | ●                       | ●                                                                       | ●                         | ●                                      | ●                    | ●                            | ●                        | ●                                | ●                       | ●                                     | ●                       | ●                            | ●                     |
| Khodadadi et al., 2021     | ●                                 | ●                                | ●                       | ●                                                                       | ●                         | ●                                      | ●                    | ●                            | ●                        | ●                                | ●                       | ●                                     | ●                       | ●                            | ●                     |
| Koh et al., 2021           | ●                                 | ●                                | ●                       | ●                                                                       | ●                         | ●                                      | ●                    | ●                            | ●                        | ●                                | ●                       | ●                                     | ●                       | ●                            | ●                     |
| Lonini et al., 2020        | ●                                 | ●                                | ●                       | ●                                                                       | ●                         | ●                                      | ●                    | ●                            | ●                        | ●                                | ●                       | ●                                     | ●                       | ●                            | ●                     |
| Mizera et al., 2021        | ●                                 | ●                                | ●                       | ●                                                                       | ●                         | ●                                      | ●                    | ●                            | ●                        | ●                                | ●                       | ●                                     | ●                       | ●                            | ●                     |
| Mol et al., 2021           | ●                                 | ●                                | ●                       | ●                                                                       | ●                         | ●                                      | ●                    | ●                            | ●                        | ●                                | ●                       | ●                                     | ●                       | ●                            | ●                     |
| Pan et al., 2021           | ●                                 | ●                                | ●                       | ●                                                                       | ●                         | ●                                      | ●                    | ●                            | ●                        | ●                                | ●                       | ●                                     | ●                       | ●                            | ●                     |
| Skazkina et al., 2021      | ●                                 | ●                                | ●                       | ●                                                                       | ●                         | ●                                      | ●                    | ●                            | ●                        | ●                                | ●                       | ●                                     | ●                       | ●                            | ●                     |
| Vrettou et al., 2020       | ●                                 | ●                                | ●                       | ●                                                                       | ●                         | ●                                      | ●                    | ●                            | ●                        | ●                                | ●                       | ●                                     | ●                       | ●                            | ●                     |

**Figure S1.** Quality assessment of cohort and cross-sectional studies according to the “Study Quality Assessment Tool” issued by the National Heart, Lung, and Blood Institute. Color legend: Green, yes; Yellow, not applicable, not reported, or cannot determine; red, no.

|                           | Clearly stated question/objective | Clearly defined study population | Sample size justification | Recruitment from the same population | Valid inclusion and exclusion criteria | Cases clearly differentiated from controls | Random selection from eligible | Use of concurrent controls | Exposure/risk occurred prior to the event | Clearly defined exposure/risk | Exposure assessors blinded to the case/control status | Adjusted statistical methods | Overall quality score |
|---------------------------|-----------------------------------|----------------------------------|---------------------------|--------------------------------------|----------------------------------------|--------------------------------------------|--------------------------------|----------------------------|-------------------------------------------|-------------------------------|-------------------------------------------------------|------------------------------|-----------------------|
| Kamaleswaran et al., 2021 | ●                                 | ●                                | ●                         | ●                                    | ●                                      | ●                                          | ●                              | ●                          | ●                                         | ●                             | ●                                                     | ●                            | ●                     |
| Khalpey et al., 2020      | ●                                 | ●                                | ●                         | ●                                    | ●                                      | ●                                          | ●                              | ●                          | ●                                         | ●                             | ●                                                     | ●                            | ●                     |
| Milovanovic et al., 2021  | ●                                 | ●                                | ●                         | ●                                    | ●                                      | ●                                          | ●                              | ●                          | ●                                         | ●                             | ●                                                     | ●                            | ●                     |
| Oates et al., 2021        | ●                                 | ●                                | ●                         | ●                                    | ●                                      | ●                                          | ●                              | ●                          | ●                                         | ●                             | ●                                                     | ●                            | ●                     |

**Figure S2.** Quality assessment of case-control studies according to the “Study Quality Assessment Tool” issued by the National Heart, Lung, and Blood Institute. Color legend: Green, yes; Yellow, not applicable, not reported, or cannot determine; red, no.

|                             | Clearly stated question/objective | Clearly described eligibility criteria | Participants representative of general/clinical population | Enrollment of all eligible participants | Sample size sufficient | Test/intervention clearly described | Clearly defined outcome | Outcome assessors blinded to exposure | Loss to follow-up <20% | Adjusted statistical methods | Multiple measures of outcome before and after | Individual-level data to determine group level effects | Overall quality score |
|-----------------------------|-----------------------------------|----------------------------------------|------------------------------------------------------------|-----------------------------------------|------------------------|-------------------------------------|-------------------------|---------------------------------------|------------------------|------------------------------|-----------------------------------------------|--------------------------------------------------------|-----------------------|
| Hijazi et al., 2021         | ●                                 | ●                                      | ●                                                          | ●                                       | ●                      | ●                                   | ●                       | ●                                     | ●                      | ●                            | ●                                             | ●                                                      | ●                     |
| Junarta et al., 2020        | ●                                 | ●                                      | ●                                                          | ●                                       | ●                      | ●                                   | ●                       | ●                                     | ●                      | ●                            | ●                                             | ●                                                      | ●                     |
| Ponomarev et al., 2021      | ●                                 | ●                                      | ●                                                          | ●                                       | ●                      | ●                                   | ●                       | ●                                     | ●                      | ●                            | ●                                             | ●                                                      | ●                     |
| Yurttaser Ocak et al., 2021 | ●                                 | ●                                      | ●                                                          | ●                                       | ●                      | ●                                   | ●                       | ●                                     | ●                      | ●                            | ●                                             | ●                                                      | ●                     |

**Figure S3.** Quality assessment of pre-post studies according to the “Study Quality Assessment Tool” issued by the National Heart, Lung, and Blood Institute. Color legend: Green, yes; Yellow, not applicable, not reported, or cannot determine; red, no.
